# Supplementary material for: Photocatalytic degradation of methyl orange by a diethylenetriamine modified chitosan/bentonite composite
Source: Royal Society of Chemistry journal article supplement (doi:10.1039/d3re00220a), 2023-01-01
Supplement: d3re00220a1.pdf [file d3re00220a1.pdf]

## Supplementary Materials

Fig. S1 Synthetic route of CCS/Bent-DETA

Fig. S2 Photoluminescence spectra of (a) chitosan, CCS-DETA and CCS/Bent-DETA;(b) CCS/Bent-DETA with varying bentonite dosage; (c) Transient PL spectra and (d) electrochemical impedance spectroscopy of chitosan, CCS-DETA, and CCS/Bent-DETA composite

Fig. S3 Photocatalytic cycle performance of CCS/Bent-DETA for MO

Table. S1 Thermodynamic parameters of MO adsorbed by CCS/Bent-DETA

Table. S2 Kinetic fitting parameters of CCS-DETA and CCS/Bent-DETA for MO photocatalysis

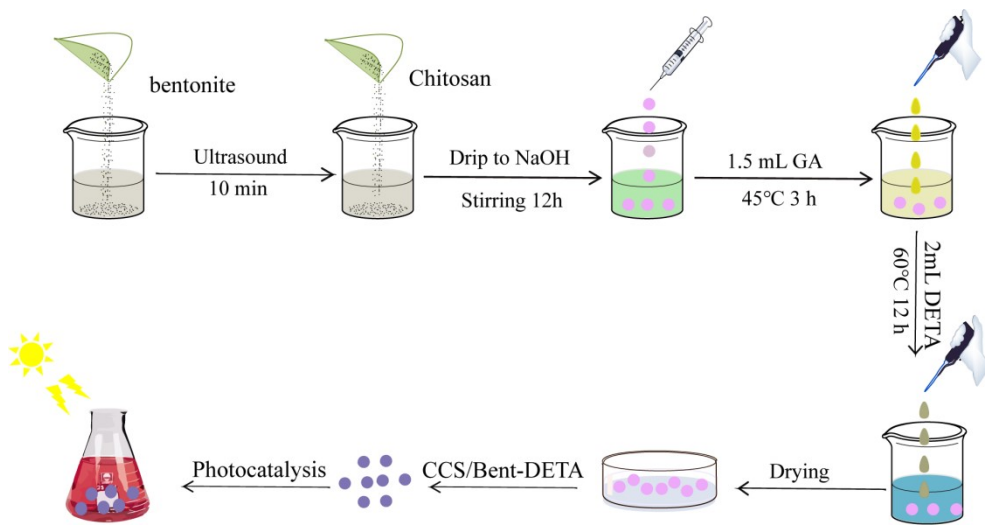

Fig. S1 Synthetic route of CCS/Bent-DETA

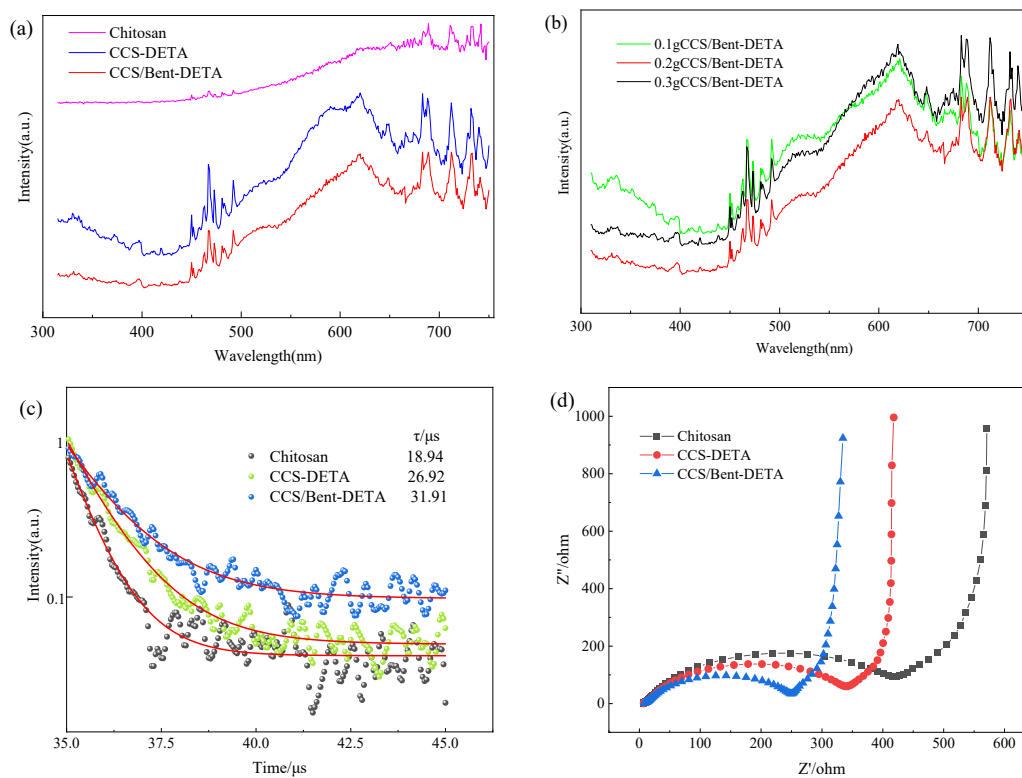

Fig. S2 Photoluminescence spectra of (a) chitosan, CCS-DETA and CCS/Bent-DETA; (b) CCS/Bent-DETA with varying bentonite dosage; (c) Transient PL spectra and (d) electrochemical impedance spectroscopy of chitosan, CCS-DETA, and CCS/Bent-DETA composite

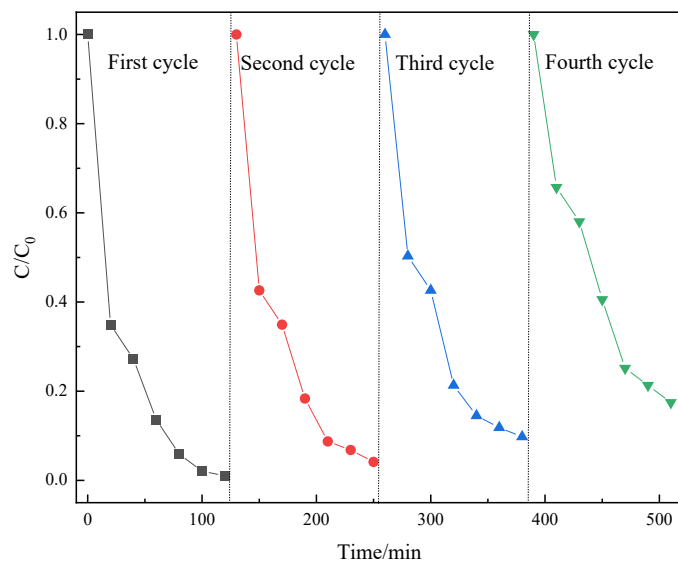

Fig. S3 Photocatalytic cycle performance of CCS/Bent-DETA for MO

Table.S1 Thermodynamic parameters of MO adsorbed by CCS/Bent-DETA

| $T/K$  | $K_C$ | $\Delta G/(\text{kJ}\cdot\text{mol}^{-1})$ | $\Delta H/(\text{kJ}\cdot\text{mol}^{-1})$ | $\Delta S/(\text{J}(\text{mol}\cdot\text{K})^{-1})$ |
|--------|-------|--------------------------------------------|--------------------------------------------|-----------------------------------------------------|
| 303.15 | 2.11  | -1.81                                      |                                            |                                                     |
| 308.15 | 2.77  | -2.51                                      | 42.46                                      | 146.36                                              |
| 313.15 | 3.70  | -3.27                                      |                                            |                                                     |

Table. S2 Kinetic fitting parameters of CCS-DETA and CCS/Bent-DETA for MO

photocatalysis

| Materials     | Pseudo-first-order kinetic model |        | Pseudo-second-order kinetic model                      |        |
|---------------|----------------------------------|--------|--------------------------------------------------------|--------|
|               | $k_1(\text{min}^{-1})$           | $R^2$  | $k_2(\text{L}\cdot\text{mg}^{-1}\cdot\text{min}^{-1})$ | $R^2$  |
| CCS-DETA      | 0.0117                           | 0.9129 | 0.0569                                                 | 0.9029 |
| CCS/Bent-DETA | 0.0491                           | 0.9912 | 0.0979                                                 | 0.9889 |
